# Supplementary material
Source: PubMed Central journal article supplement (PMC4995140)
Supplement: NIHMS793926-supplement.pdf [file NIHMS793926-supplement.pdf]

## A pattern pulleys

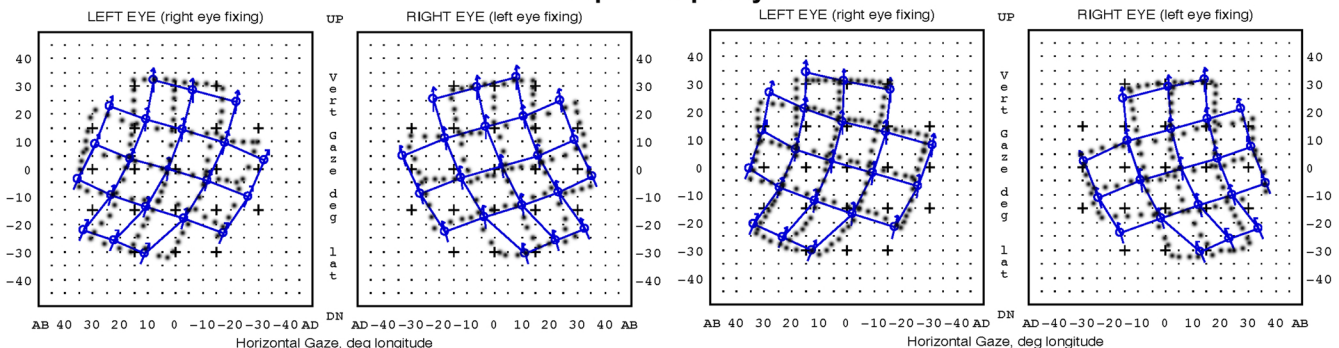

## V pattern pulleys

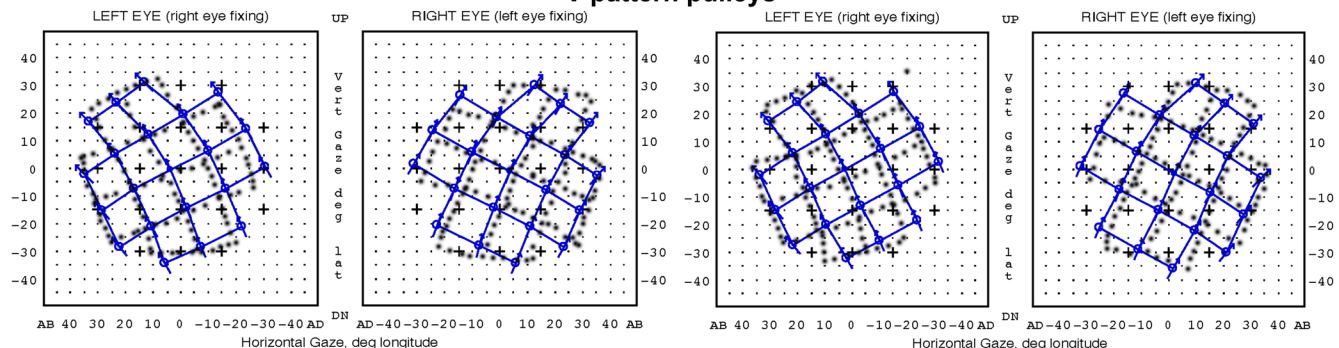

## Y pattern pulleys

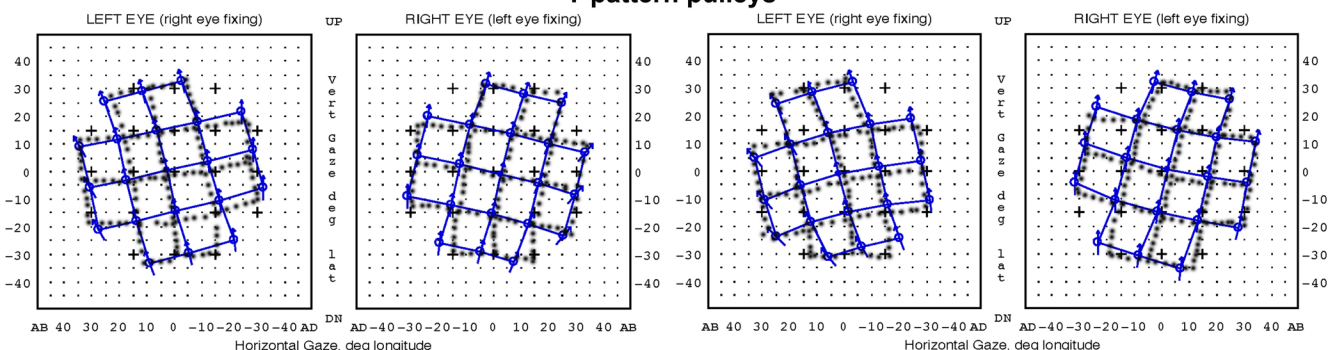

— Simulation

••••• Measurement

**Supplemental Fig. S1. Simulated binocular alignment based upon measured pulley positions for every subject with A-, V- and Y-pattern exotropia.**
